# Supplementary material
Source: PubMed Central journal article supplement (PMC1829255)

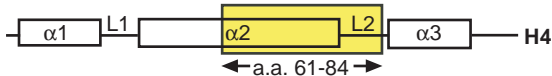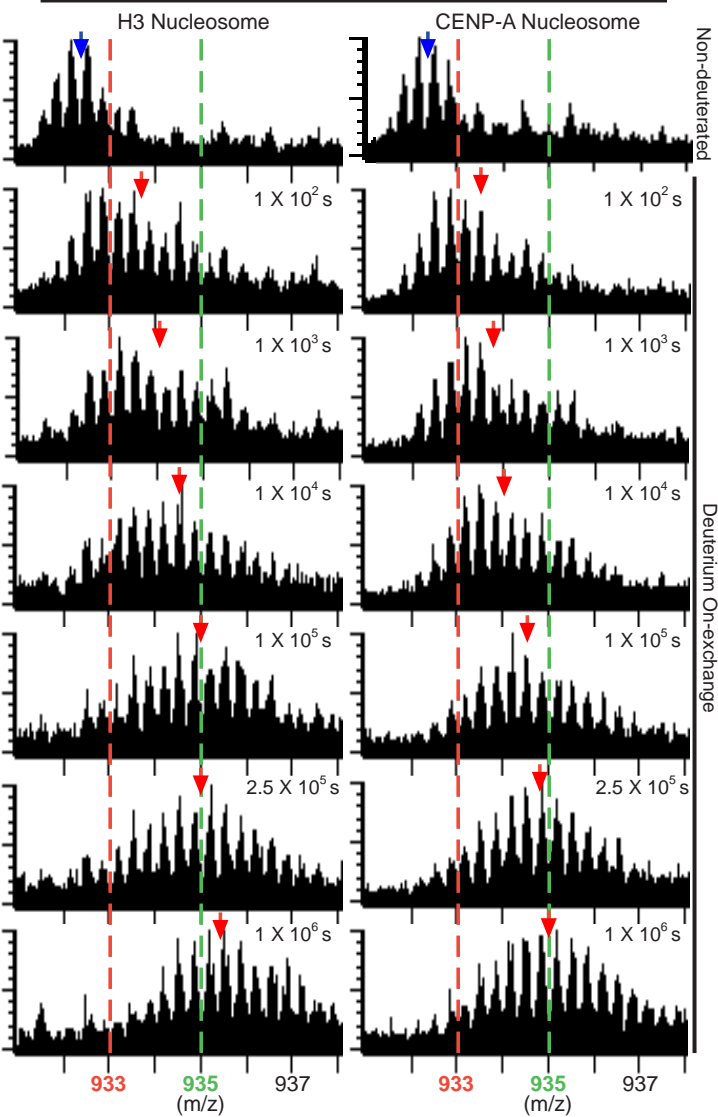

Supplement: pnas_0700390104_1.pdf [file pnas_0700390104_1.pdf]

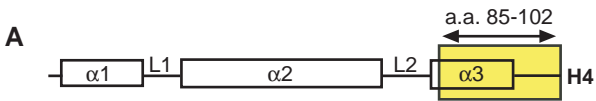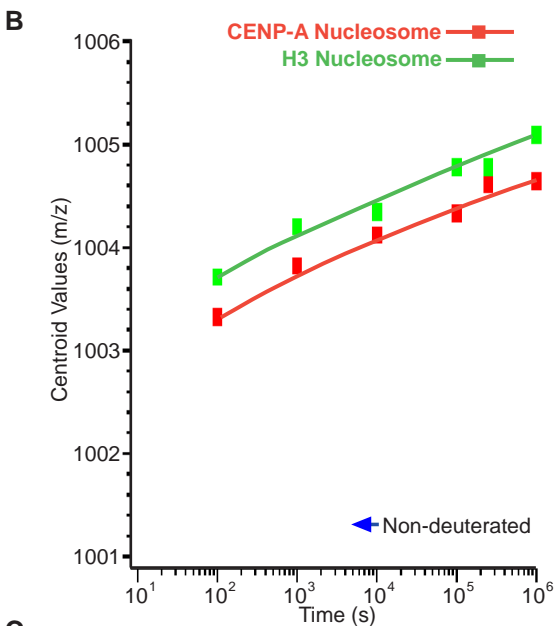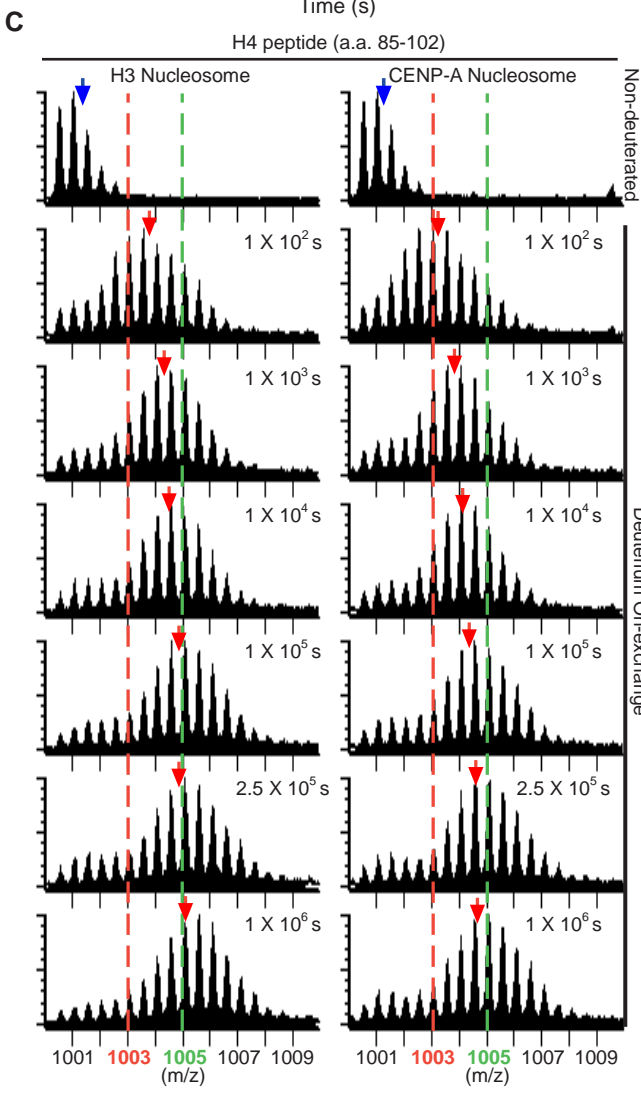

Supplement: pnas_0700390104_2.pdf [file pnas_0700390104_2.pdf]

**A**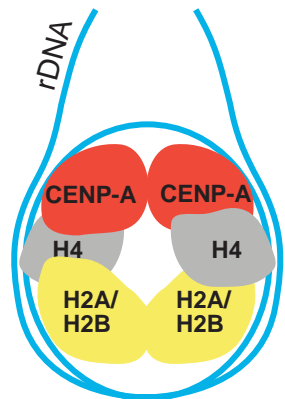**B**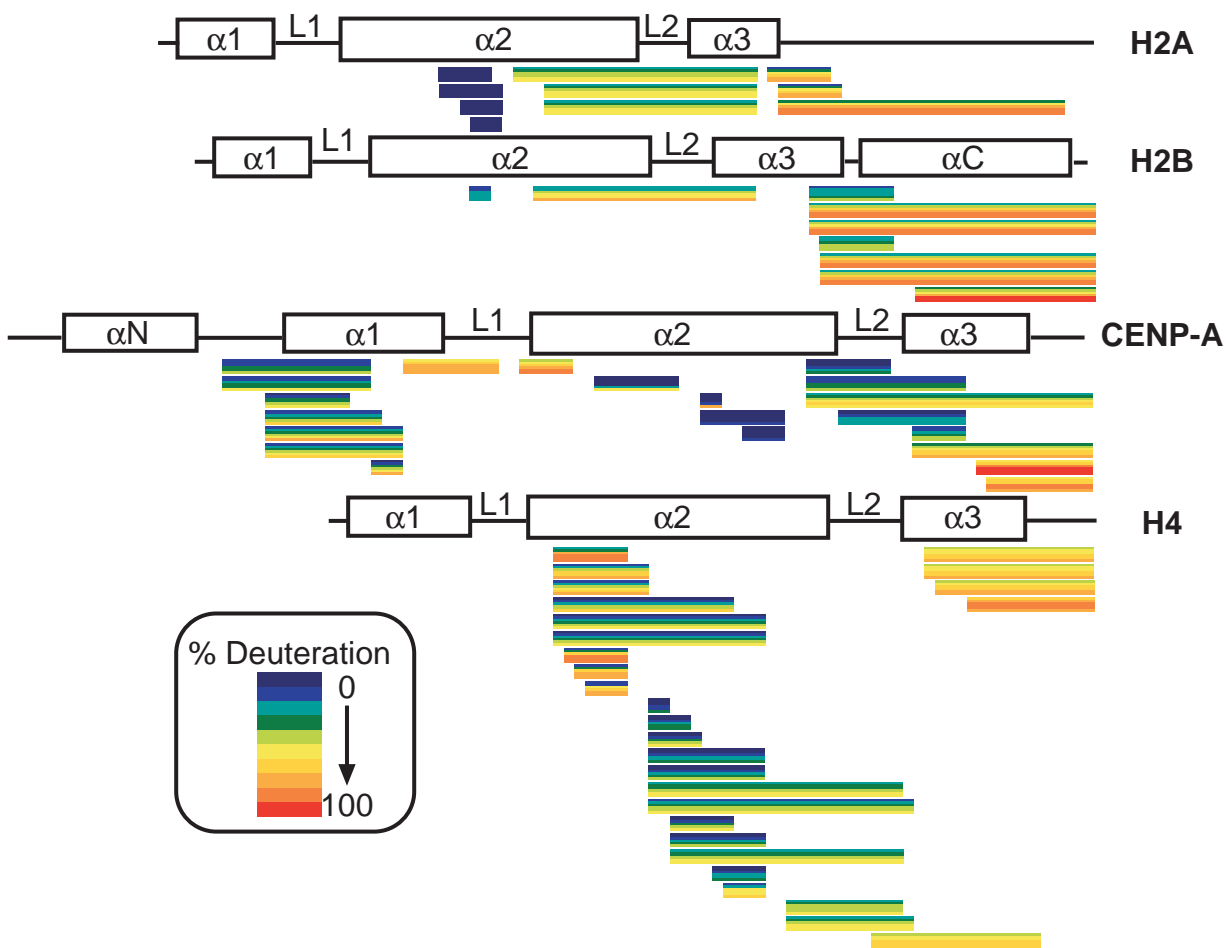

Supplement: pnas_0700390104_3.pdf [file pnas_0700390104_3.pdf]

**A**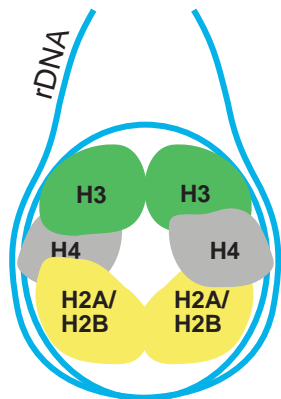**B**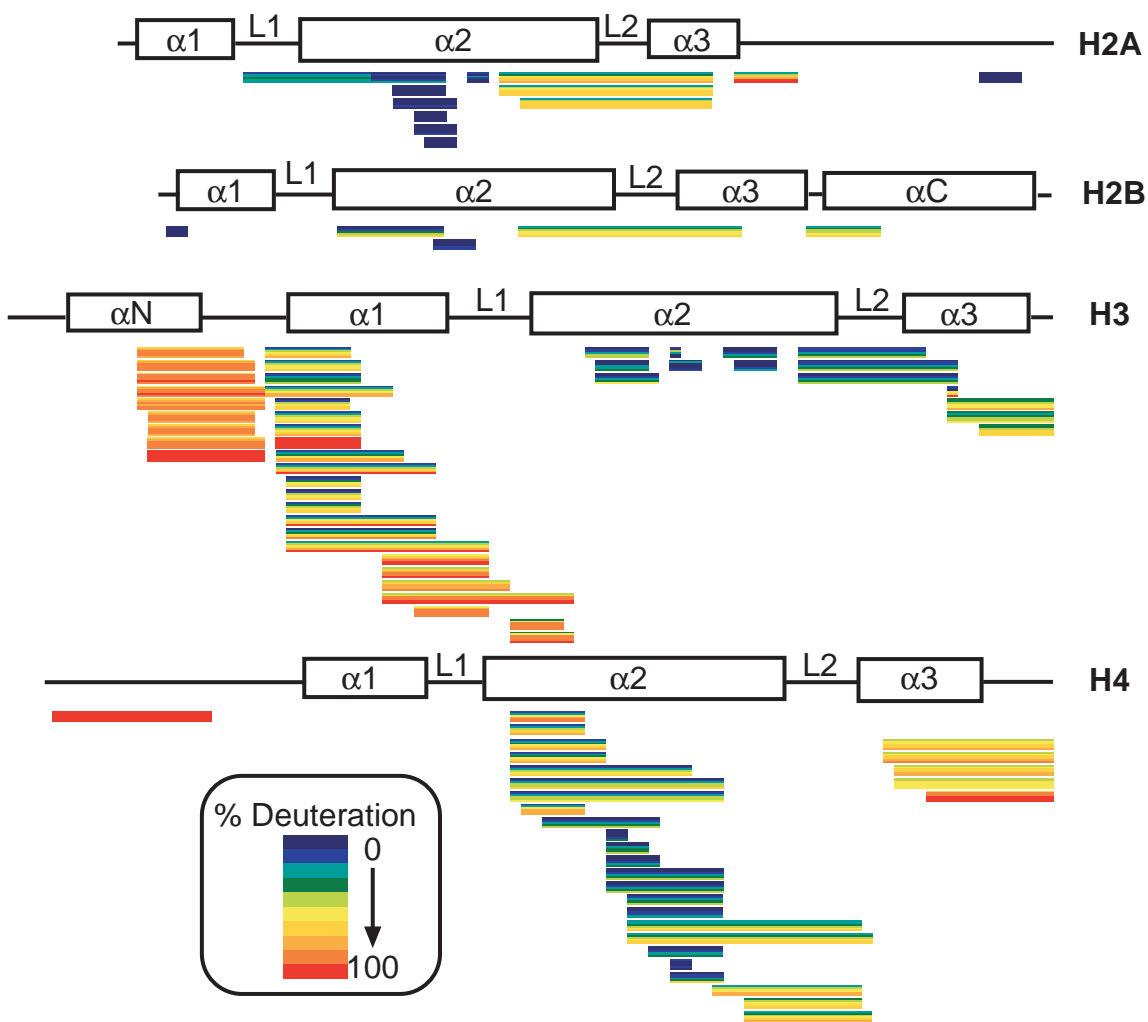

Supplement: pnas_0700390104_4.pdf [file pnas_0700390104_4.pdf]

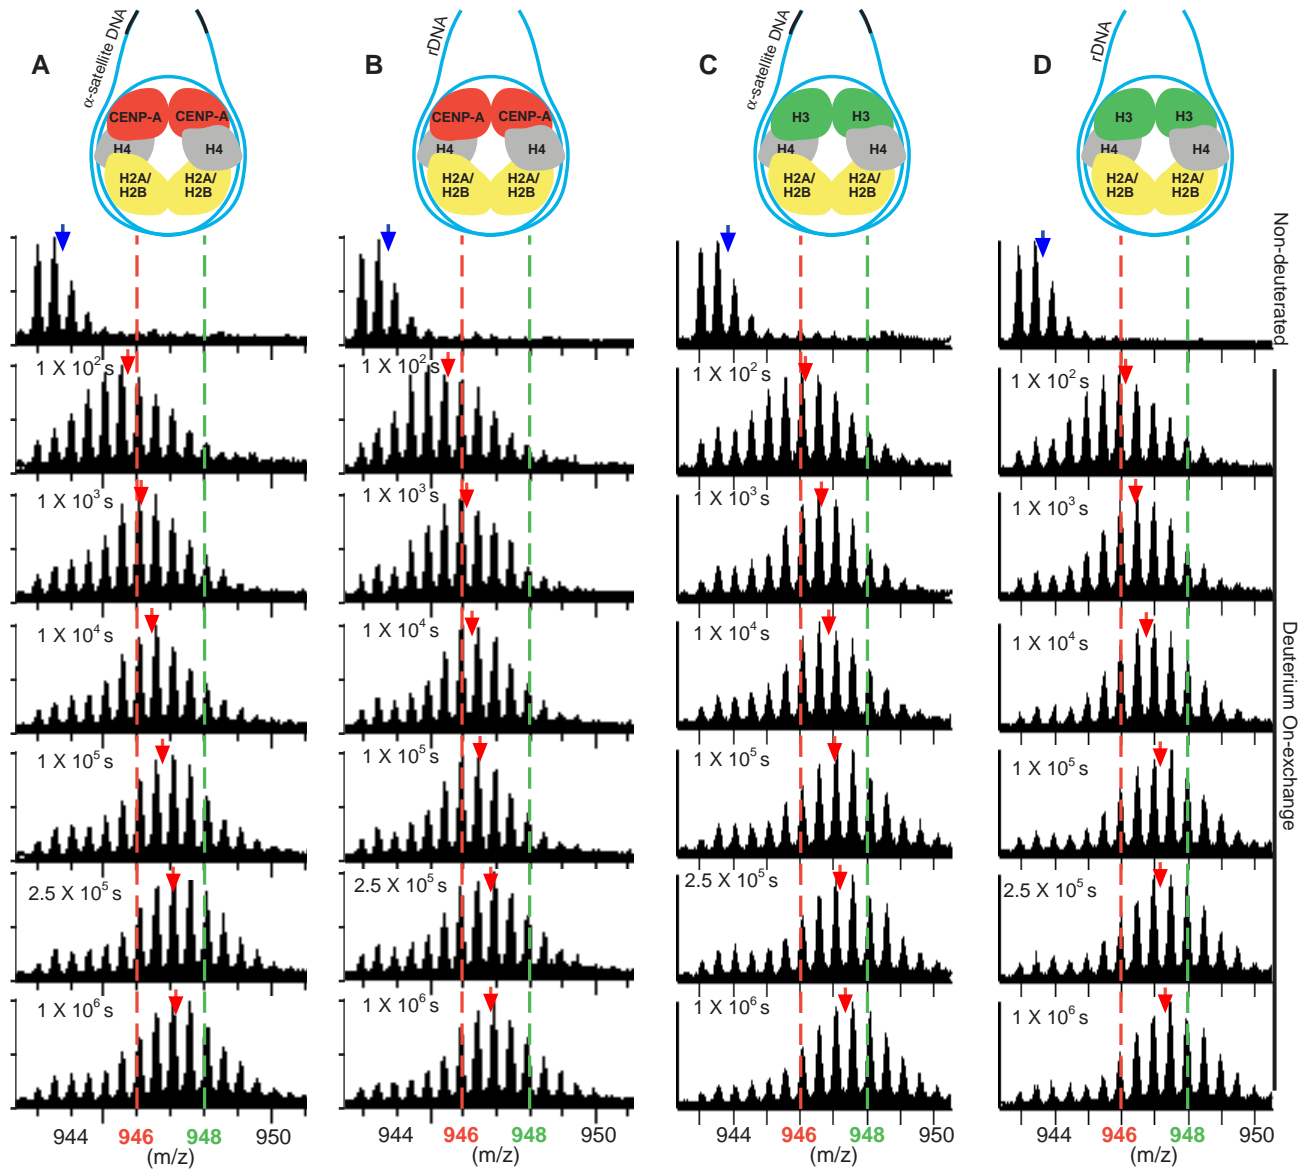

Supplement: pnas_0700390104_5.pdf [file pnas_0700390104_5.pdf]

## CENP-A peptide (a.a. 91-100)

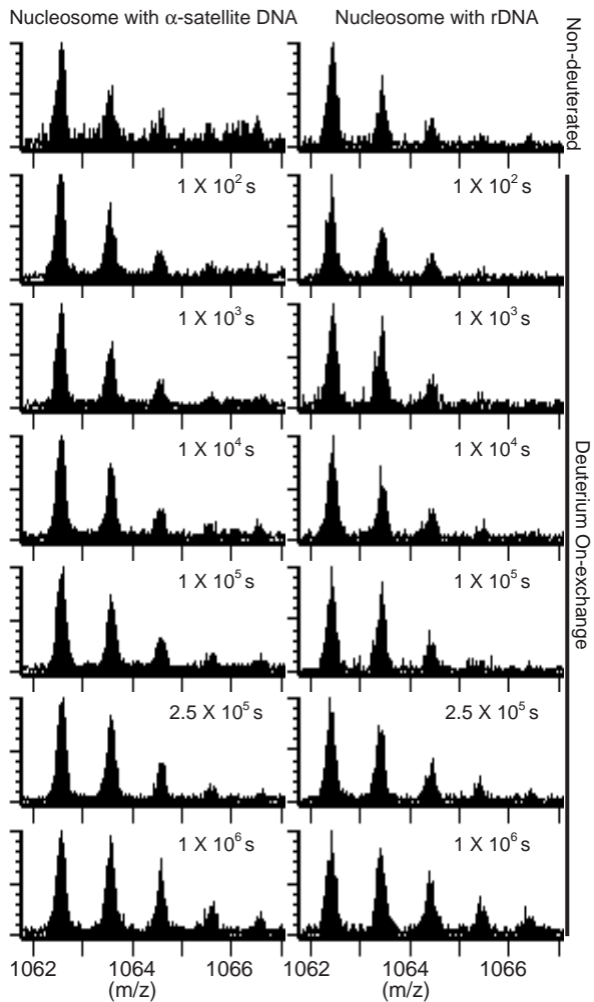

Supplement: pnas_0700390104_6.pdf [file pnas_0700390104_6.pdf]

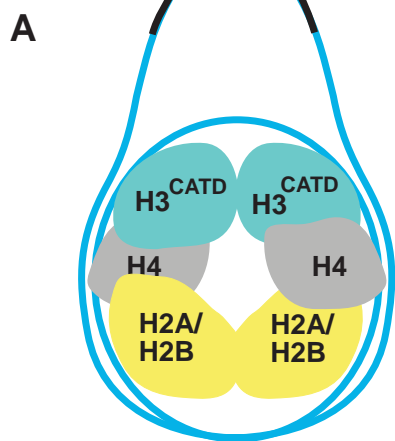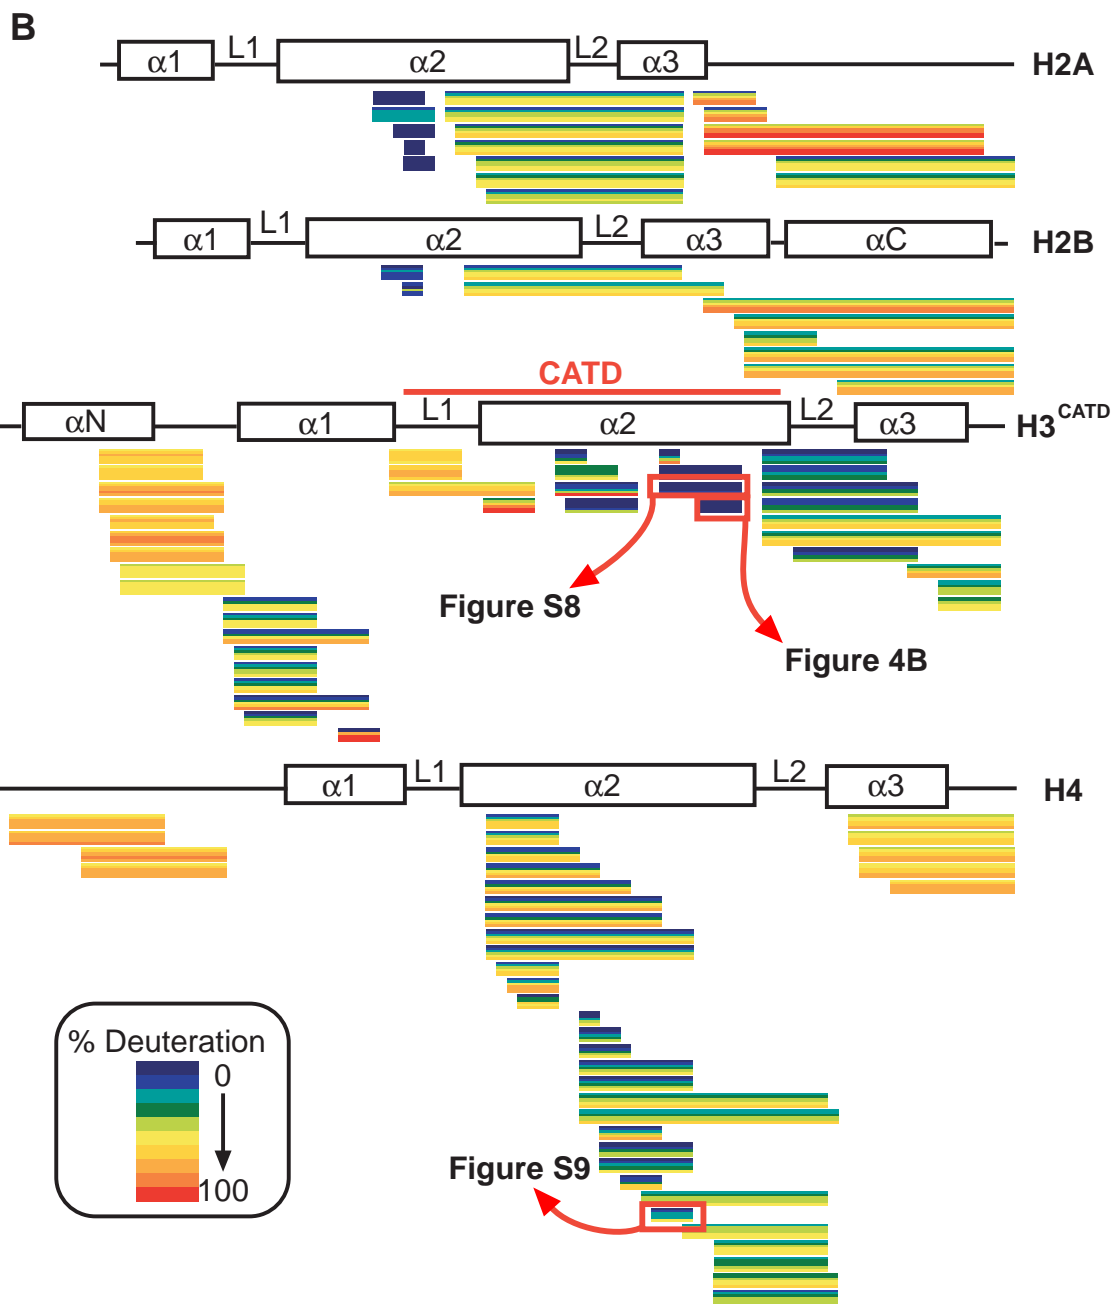

Supplement: pnas_0700390104_7.pdf [file pnas_0700390104_7.pdf]

## H4 peptide (a.a. 65-70)

CENP-A Nucleosome

H3<sup>CATD</sup> Nucleosome

Non-deuterated

Deuterium On-exchange

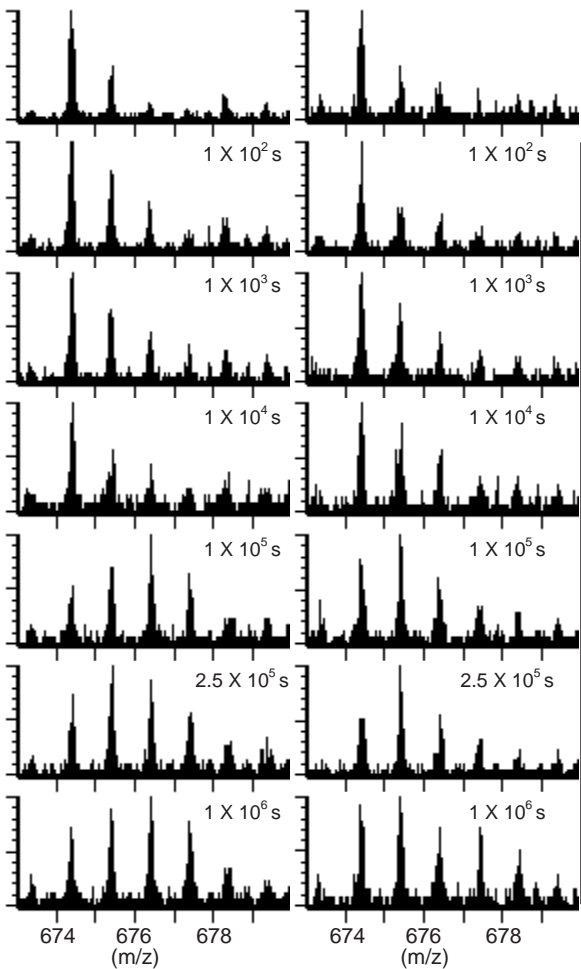

Supplement: pnas_0700390104_8.pdf [file pnas_0700390104_8.pdf]

## CENP-A peptide (a.a. 101-110)

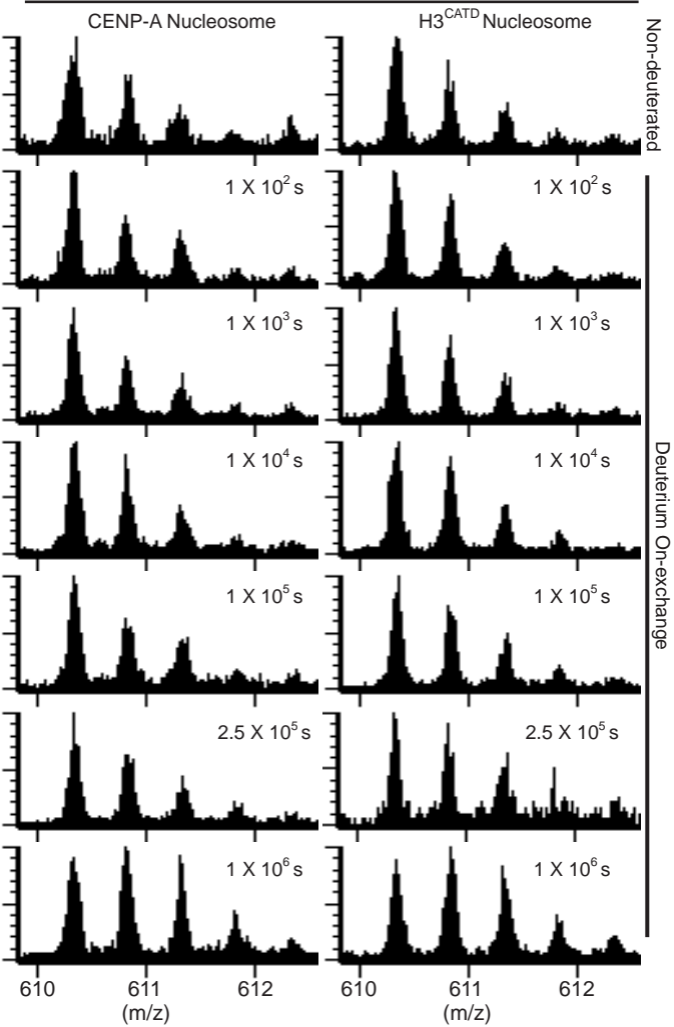

Supplement: pnas_0700390104_9.pdf [file pnas_0700390104_9.pdf]
